# Supplementary material for: Beneficial properties of selenium incorporated guar gum nanoparticles against ischemia/reperfusion in cardiomyoblasts (H9c2)
Source: Royal Society of Chemistry journal article supplement (doi:10.1039/c4mt00241e), 2014-10-01
Supplement: c4mt00241e1.pdf [file c4mt00241e1.pdf]

Supplementary table 1 Alteration of LDH during ischemia and I/R and modulation by various test materials (Se, GGN and SGG)

| <b>LDH LEVEL</b>             | Average values | %       | Difference from control | Difference from I/R* |
|------------------------------|----------------|---------|-------------------------|----------------------|
| Control                      | 14.758         | 100     |                         |                      |
| ischemia                     | 141.047        | 955.732 | <b>855.732</b>          |                      |
| IR                           | 114.758        | 777.599 | <b>677.599</b>          |                      |
| 60 µg GG                     | 21.906         | 148.435 | <b>48.435</b>           | <b>629.164</b>       |
| 300 µg GG                    | 19.328         | 130.966 | <b>30.966</b>           | <b>646.633</b>       |
| 5 Se                         | 18.664         | 126.467 | <b>26.467</b>           | <b>651.132</b>       |
| <b>Descriptives</b><br>25 Se | 20.657         | 139.971 | <b>39.971</b>           | <b>637.628</b>       |
| 5 SGG                        | 11.594         | 78.561  | <b>21.439</b>           | <b>699.038</b>       |
| 25 SGG                       | 14.094         | 95.501  | <b>4.499</b>            | <b>682.098</b>       |

\*The results of test materials were compared with I/R groups for evaluation of performance each materials among the groups.

Supplementary table 2 Alteration of antioxidant enzymes (SOD, Catalase, GPx) during ischemia and I/R and modulation by various test materials (Se, GGN and SGG)

| <b>SOD ACTIVITY</b> | Average values | %          | Difference from control | Difference from I/R* |
|---------------------|----------------|------------|-------------------------|----------------------|
| Control             | 0.908288       | 100        |                         |                      |
| ischemia            | 0.441761       | 48.637     | <b>51.363</b>           |                      |
| IR                  | 0.523622       | 57.649     | <b>42.351</b>           |                      |
| 60 µg GG            | 0.678162       | 74.664     | <b>25.336</b>           | <b>17.015</b>        |
| 300 µg GG           | 0.624571       | 68.763     | <b>31.237</b>           | <b>11.114</b>        |
| 5 Se                | 0.760263       | 83.703     | <b>16.297</b>           | <b>26.054</b>        |
| 25 Se               | 0.866973       | 95.451     | <b>4.549</b>            | <b>37.802</b>        |
| 5 SGG               | 0.873497       | 96.17      | <b>3.83</b>             | <b>38.521</b>        |
| 25 SGG              | 0.940347       | 103.53     | <b>3.53</b>             | <b>45.881</b>        |
| <b>CATALASE</b>     |                |            |                         |                      |
| Control             | 0.116475       | <b>100</b> |                         |                      |
| ischemia            | 0.033818       | 29.034     | <b>70.966</b>           |                      |
| IR                  | 0.047448       | 40.737     | <b>59.263</b>           |                      |
| 60 µg GG            | 0.091762       | 78.783     | <b>21.217</b>           | <b>38.046</b>        |
| 300 µg GG           | 0.09283        | 79.7       | <b>20.3</b>             | <b>38.963</b>        |
| 5 Se                | 0.093026       | 79.868     | <b>20.132</b>           | <b>39.131</b>        |
| 25 Se               | 0.096106       | 82.512     | <b>17.488</b>           | <b>41.775</b>        |
| 5 SGG               | 0.103885       | 89.191     | <b>10.809</b>           | <b>48.454</b>        |
| 25 SGG              | 0.106969       | 91.838     | <b>8.162</b>            | <b>51.101</b>        |
| <b>GPx Activity</b> |                |            |                         |                      |
| Control             | 0.340519       | 100        |                         |                      |
| ischemia            | 0.228152       | 67.001     | <b>32.999</b>           |                      |
| IR                  | 0.248813       | 73.069     | <b>26.931</b>           |                      |
| 60 µg GG            | 0.329135       | 96.657     | <b>3.343</b>            | <b>23.588</b>        |
| 300 µg GG           | 0.322876       | 94.819     | <b>5.181</b>            | <b>21.75</b>         |
| 5 Se                | 0.312499       | 91.771     | <b>8.229</b>            | <b>18.702</b>        |
| 25 Se               | 0.335618       | 98.561     | <b>1.439</b>            | <b>25.492</b>        |
| 5 SGG               | 0.333431       | 97.919     | <b>2.081</b>            | <b>24.85</b>         |
| 25 SGG              | 0.339006       | 99.556     | <b>0.444</b>            | <b>26.487</b>        |

\*The results of test materials were compared with I/R groups for evaluation of performance each materials among the groups

Supplementary table 3 Alteration of antioxidant enzymes (glutathione, Trx, Total antioxidant level) during ischemia and I/R and modulation by various test materials (Se, GGN and SGG)

| <b>Glutathione Activity</b>    | Average values | %       | Difference from control | Difference from I/R* |
|--------------------------------|----------------|---------|-------------------------|----------------------|
| Control                        | 0.2673908      | 100     |                         |                      |
| ischemia                       | 0.1427424      | 53.383  | <b>46.617</b>           |                      |
| IR                             | 0.1607651      | 60.124  | <b>39.876</b>           |                      |
| 60 µg GG                       | 0.1870005      | 69.935  | <b>30.065</b>           | <b>9.811</b>         |
| 300 µg GG                      | 0.1960511      | 73.32   | <b>26.68</b>            | <b>13.196</b>        |
| 5 Se                           | 0.1810859      | 67.723  | <b>32.277</b>           | <b>7.599</b>         |
| 25 Se                          | 0.1923708      | 71.944  | <b>28.056</b>           | <b>11.82</b>         |
| 5 SGG                          | 0.2051551      | 76.725  | <b>23.275</b>           | <b>16.601</b>        |
| 25 SGG                         | 0.1991987      | 74.497  | <b>25.503</b>           | <b>14.373</b>        |
| <b>Trx Activity</b>            |                |         |                         |                      |
| Control                        | 0.004267       | 100     |                         |                      |
| ischemia                       | 0.001933       | 45.312  | <b>54.688</b>           |                      |
| IR                             | 0.002267       | 53.125  | <b>46.875</b>           |                      |
| 60 µg GG                       | 0.002533       | 59.375  | <b>40.625</b>           | <b>6.25</b>          |
| 300 µg GG                      | 0.003467       | 81.25   | <b>18.75</b>            | <b>28.125</b>        |
| 5 Se                           | 0.002967       | 69.531  | <b>30.469</b>           | <b>16.406</b>        |
| 25 Se                          | 0.0039         | 91.406  | <b>8.594</b>            | <b>38.281</b>        |
| 5 SGG                          | 0.003867       | 90.625  | <b>9.375</b>            | <b>37.5</b>          |
| 25 SGG                         | 0.004667       | 109.375 | <b>9.375</b>            | <b>56.25</b>         |
| <b>Total antioxidant level</b> |                |         |                         |                      |
| Control                        | 0.05           | 100     |                         |                      |
| ischemia                       | 0.02           | 40      | <b>60</b>               |                      |
| IR                             | 0.025333       | 50.667  | <b>49.333</b>           |                      |
| 60 µg GG                       | 0.044          | 87.999  | <b>12.001</b>           | <b>37.332</b>        |
| 300 µg GG                      | 0.05           | 100     | <b>0</b>                | <b>49.333</b>        |
| 5 Se                           | 0.039333       | 78.666  | <b>21.334</b>           | <b>27.999</b>        |
| 25 Se                          | 0.053667       | 107.333 | <b>7.333</b>            | <b>56.666</b>        |
| 5 SGG                          | 0.047333       | 94.667  | <b>5.333</b>            | <b>44</b>            |
| 25 SGG                         | 0.054667       | 109.333 | <b>9.333</b>            | <b>58.666</b>        |

\*The results of test materials were compared with I/R groups for evaluation of performance each materials among the groups

Supplementary table 4 Alteration of Protein carbonyl content, lipid peroxidation and xanthine oxidase activity during ischemia and I/R and modulation by various test materials (Se, GGN and SGG)

| <b>Protein carbonyl assay</b>   | Average values | %       | Difference from control | Difference from I/R* |
|---------------------------------|----------------|---------|-------------------------|----------------------|
| Control                         | 2.171615       | 100     |                         |                      |
| ischemia                        | 9.300756       | 428.287 | <b>328.287</b>          |                      |
| IR                              | 7.182285       | 330.735 | <b>230.735</b>          |                      |
| 60 µg GG                        | 3.142306       | 144.699 | <b>44.699</b>           | <b>186.036</b>       |
| 300 µg GG                       | 3.637312       | 167.493 | <b>67.493</b>           | <b>163.242</b>       |
| 5 Se                            | 2.736424       | 126.009 | <b>26.009</b>           | <b>204.726</b>       |
| 25 Se                           | 4.314934       | 198.697 | <b>98.697</b>           | <b>132.038</b>       |
| 5 SGG                           | 2.441221       | 112.415 | <b>12.415</b>           | <b>218.32</b>        |
| 25 SGG                          | 1.851043       | 85.238  | <b>14.762</b>           | <b>245.497</b>       |
| <b>Lipid peroxidation assay</b> |                |         |                         |                      |
| Control                         | 0.714          | 100     |                         |                      |
| ischemia                        | 1.567778       | 219.577 | <b>119.577</b>          |                      |
| IR                              | 1.297768       | 181.76  | <b>81.76</b>            |                      |
| 60 µg GG                        | 0.860255       | 120.484 | <b>20.484</b>           | <b>61.276</b>        |
| 300 µg GG                       | 0.881329       | 123.435 | <b>23.435</b>           | <b>58.325</b>        |
| 5 Se                            | 0.797479       | 111.692 | <b>11.692</b>           | <b>70.068</b>        |
| 25 Se                           | 0.744536       | 104.277 | <b>4.277</b>            | <b>77.483</b>        |
| 5 SGG                           | 0.652204       | 91.345  | <b>8.655</b>            | <b>90.415</b>        |
| 25 SGG                          | 0.558384       | 78.205  | <b>21.795</b>           | <b>103.555</b>       |
| <b>Xanthine oxidase assay</b>   |                |         |                         |                      |
| Control                         | 60002          | 100     |                         |                      |
| ischemia                        | 89296          | 148.822 | <b>48.822</b>           |                      |
| IR                              | 79576          | 132.622 | <b>32.622</b>           |                      |
| 60 µg GG                        | 64816          | 108.023 | <b>8.023</b>            | <b>24.599</b>        |
| 300 µg GG                       | 66376          | 110.623 | <b>10.623</b>           | <b>21.999</b>        |
| 5 Se                            | 65189          | 108.645 | <b>8.645</b>            | <b>23.977</b>        |
| 25 Se                           | 55482          | 92.467  | <b>7.533</b>            | <b>40.155</b>        |
| 5 SGG                           | 57442          | 95.733  | <b>4.267</b>            | <b>36.889</b>        |
| 25 SGG                          | 53482          | 89.134  | <b>10.866</b>           | <b>43.488</b>        |

\*The results of test materials were compared with I/R groups for evaluation of performance each materials among the groups

Supplementary table 5 Alteration of calcium ATPase & calcium content during ischemia and I/R and modulation by various test materials (Se, GGN and SGG)

| <b>Calcium ATPase</b>                    | Average values | %          | Difference from control | Difference from I/R* |
|------------------------------------------|----------------|------------|-------------------------|----------------------|
| Control                                  | 0.187649       | 100        |                         |                      |
| ischemia                                 | 0.0455         | 24.247     | <b>75.753</b>           |                      |
| IR                                       | 0.102857       | 54.814     | <b>45.186</b>           |                      |
| 60 µg GG                                 | 0.154292       | 82.224     | <b>17.776</b>           | <b>27.41</b>         |
| 300 µg GG                                | 0.189833       | 101.164    | <b>1.164</b>            | <b>46.35</b>         |
| 5 Se                                     | 0.179333       | 95.569     | <b>4.431</b>            | <b>40.755</b>        |
| 25 Se                                    | 0.198917       | 106.005    | <b>6.005</b>            | <b>51.191</b>        |
| 5 SGG                                    | 0.199286       | 106.201    | <b>6.201</b>            | <b>51.387</b>        |
| 25 SGG                                   | 0.213958       | 114.021    | <b>14.021</b>           | <b>59.207</b>        |
| <b>Calcium assay</b>                     |                |            |                         |                      |
| Control                                  | 1.88086        | <b>100</b> |                         |                      |
| ischemia                                 | 3.343561       | 177.768    | <b>77.768</b>           |                      |
| IR                                       | 3.060211       | 162.703    | <b>62.703</b>           |                      |
| 60 µg GG                                 | 2.422825       | 128.815    | <b>28.815</b>           | <b>33.888</b>        |
| 300 µg GG                                | 2.185947       | 116.221    | <b>16.221</b>           | <b>46.482</b>        |
| 5 Se                                     | 2.523193       | 134.151    | <b>34.151</b>           | <b>28.552</b>        |
| 25 Se                                    | 2.213175       | 117.668    | <b>16.221</b>           | <b>45.035</b>        |
| 5 SGG                                    | 2.259702       | 120.142    | <b>20.142</b>           | <b>42.561</b>        |
| 25 SGG                                   | 2.107228       | 112.035    | <b>12.035</b>           | <b>50.668</b>        |
| <b>Calcium determination (Fura 2 AM)</b> |                |            |                         |                      |
| Control                                  | 63.4           | 100        |                         |                      |
| ischemia                                 | 153            | 241.325    | <b>141.325</b>          |                      |
| IR                                       | 143.6667       | 226.604    | <b>126.604</b>          |                      |
| 60 µg GG                                 | 92.33333       | 145.636    | <b>45.636</b>           | <b>80.968</b>        |
| 300 µg GG                                | 87             | 137.223    | <b>37.223</b>           | <b>89.381</b>        |
| 5 Se                                     | 94             | 148.265    | <b>48.265</b>           | <b>78.339</b>        |
| 25 Se                                    | 87.66667       | 138.275    | <b>38.275</b>           | <b>88.329</b>        |
| 5 SGG                                    | 82.66667       | 130.389    | <b>30.389</b>           | <b>96.215</b>        |
| 25 SGG                                   | 77.33333       | 121.977    | <b>21.977</b>           | <b>104.627</b>       |

\*The results of test materials were compared with I/R groups for evaluation of performance each materials among the groups

Supplementary table 6 Alteration of Caspase 3 activity during ischemia and I/R and modulation by various test materials (Se, GGN and SGG)

| <b>Caspase 3 assay</b> | Average values | %       | Difference from control | Difference from I/R* |
|------------------------|----------------|---------|-------------------------|----------------------|
| Control                | 4379845        | 100     |                         |                      |
| Ischemia               | 13515845       | 308.592 | <b>208.592</b>          |                      |
| I/R                    | 12547845       | 286.491 | <b>186.491</b>          |                      |
| 60 µg GGN              | 4129845        | 94.292  | <b>5.708</b>            | <b>192.199</b>       |
| 300 µg GGN             | 5826245        | 133.024 | <b>33.024</b>           | <b>153.467</b>       |
| 5 nM Se                | 3768845        | 86.05   | <b>13.95</b>            | <b>200.441</b>       |
| 25 nM Se               | 4507845        | 102.922 | <b>2.922</b>            | <b>183.569</b>       |
| 5 nM SGG               | 3219445        | 73.506  | <b>26.494</b>           | <b>259.997</b>       |
| 25 nM SGG              | 2433845        | 55.569  | <b>44.431</b>           | <b>230.922</b>       |

\*The results of test materials were compared with I/R groups for evaluation of performance each materials among the groups

Supplementary table 7 Alteration of ROS generation during ischemia and I/R and modulation by various test materials (Se, GGN and SGG)

| <b>ROS Scavenging assay</b> | Average values | %       | Difference from control | Difference from I/R* |
|-----------------------------|----------------|---------|-------------------------|----------------------|
| Control                     | 10386.33       | 100     |                         |                      |
| Ischemia                    | 14969.67       | 144.129 | <b>44.129</b>           |                      |
| I/R                         | 12647          | 121.766 | <b>21.766</b>           |                      |
| 60 µg GGN                   | 12098          | 116.48  | <b>16.48</b>            | <b>5.286</b>         |
| 300 µg GGN                  | 10289          | 99.063  | <b>0.937</b>            | <b>22.703</b>        |
| 5 nM Se                     | 12159          | 117.067 | <b>17.067</b>           | <b>4.699</b>         |
| 25 nM Se                    | 10084.33       | 97.092  | <b>2.908</b>            | <b>24.674</b>        |
| 5 nM SGG                    | 9474.667       | 91.222  | <b>8.778</b>            | <b>30.544</b>        |
| 25 nM SGG                   | 5750.667       | 55.368  | <b>44.632</b>           | <b>66.398</b>        |

\*The results of test materials were compared with I/R groups for evaluation of performance each materials among the groups
